# Supplementary material
Source: Research Square preprint supplement (doi:10.21203/rs.3.rs-8891109/v1)
Supplement: Supplementary file 1 [file 6fdd1078008b54e982c34af8.docx]

**Additional file 2**

| **Age and Comorbidity over the years within urgency levels A and B.** | | | | | | | | |
| --- | --- | --- | --- | --- | --- | --- | --- | --- |
| **Urgency level A *n=118828*** | | | | | | | | |
|  | **2017** | **2018** | **2019** | **2020** | **2021** | **2022** | **2023** | **All** |
| N (%) | 16245 (62) | 17170 (61) | 16090 (59) | 16355 (61) | 17096 (58) | 17853 (55) | 18007 (55) | 118816 (59) |
| Females n (%) | 7150 (44) | 7608 (44) | 7196 (45) | 7166 (44) | 7705 (45) | 8044 (45) | 8044 (45) | 52952 (45) |
| Age, median (IQR) | 64 (47-77) | 64 (48-77) | 65 (48-77) | 66 (49-77) | 65 (49-78) | 67 (49-78) | 66 (48-78) | 65 (48-78) |
| **Comorbidity n (%)** |  |  |  |  |  |  |  |  |
| *None* | 8984 (55) | 8898 (52) | 8094 (50) | 8306 (51) | 8687 (51) | 9037 (51) | 9194 (51) | 61200 (52) |
| *Moderate* | 5548 (34) | 6173 (36) | 5660 (35) | 5783 (35) | 6107 (36) | 6276 (35) | 6214 (35) | 41761 (35) |
| *Severe* | 1713 (11) | 2099 (12) | 2336 (15) | 2266 (14) | 2302 (13) | 2540 (14) | 2599 (14) | 15855 (13) |
| **Urgency level B *n=83,943*** | | | | | | | | |
| N (%) | 9819 (38) | 11191 (39) | 11081 (41) | 10564 (39) | 12451 (42) | 14344 (45) | 14480 (45) | 83930 (41) |
| Females n (%) | 4697 (48) | 5321 (48) | 5357 (48) | 5148 (49) | 5983 (48) | 6942 (48) | 7023 (49) | 40471 (48) |
| Age, median (IQR) | 61 (41-76) | 62 (42-76) | 64 (42-77) | 65 (44-78) | 65 (42-78) | 67 (45-79) | 66 (44-79) | 65 (43-78) |
| **Comorbidity n (%)** |  |  |  |  |  |  |  |  |
| *None* | 6555 (67) | 7113 (64) | 6717 (61) | 6323 (60) | 7549 (61) | 8597 (60) | 8770 (61) | 51624 (62) |
| *Moderate* | 2514 (26) | 3052 (27) | 3126 (28) | 3066 (29) | 3539 (28) | 4082 (28) | 4067 (28) | 23446 (28) |
| *Severe* | 750 (8) | 1026 (9) | 1238 (11) | 1175 (11) | 1363 (11) | 1665 (12) | 1643 (11) | 8860 (11) |
