# Supplementary material
Source: Research Square preprint supplement (doi:10.21203/rs.3.rs-8891109/v1)
Supplement: Supplementary file 2 [file a68f7f828641e3922bc89701.docx]

**Additional file 3**

| **0-1 day 2-7 days and 0-30 days mortality within the mNEWS2 scores.** | | | | | |
| --- | --- | --- | --- | --- | --- |
|  | **All** | | | **Urgency level A**  **(n=110865)** | **Urgency level B**  **(n=76447)** |
|  | **0-1 day mortality** | **2-7 days mortality** | **0-30 days mortality** | **0-30 days mortality** | **0-30 days mortality** |
| **mNEWS2 groups n (%)** | | | | | |
| **Normal vital signs** | 46 (0) | 125 (0) | 478 (1) | 244 (1) | 234 (1) |
| **Non-critical** | 746 (1) | 1273 (1) | 4217 (4) | 2736 (4) | 1481 (3) |
| **Critical** | 2434 (10) | 1592 (6) | 5758 (23) | 4712 (25) | 1046 (16) |
| **Incomplete** | 4212 (27) | 139 (1) | 4509 (29) | 3078 (39) | 1431 (19) |
| **mNEWS2 n %** | | | | | |
| **0** | 46 (0) | 125 (0) | 478 (1) | 244 (3) | 234 (8) |
| **1** | 42 (0) | 127 (0) | 438 (1) | 234 (3) | 204 (7) |
| **2** | 43 (0) | 140 (1) | 445 (2) | 250 (3) | 195 (7) |
| **3** | 112 (0) | 226 (1) | 790 (3) | 473 (6) | 317 (11) |
| **4** | 85 (1) | 175 (1) | 593 (4) | 386 (5) | 207 (8) |
| **5** | 186 (2) | 311 (3) | 974 (8) | 667 (9) | 307 (11) |
| **6** | 278 (3) | 294 (3) | 977 (10) | 726 (9) | 251 (9) |
| **7** | 281 (4) | 266 (4) | 873 (13) | 646 (8) | 227 (8) |
| **8** | 418 (7) | 357 (6) | 1186 (19) | 950 (12) | 236 (9) |
| **9** | 580 (2) | 268 (6) | 1171 (25) | 930 (12) | 241 (9) |
| **10** | 298 (10) | 227 (7) | 769 (25) | 636 (8) | 133 (5) |
| **11** | 337 (15) | 204 (9) | 723 (32) | 614 (8) | 109 (4) |
| **12** | 222 (21) | 108 (10) | 422 (40) | 385 (5) | 37 (1) |
| **13** | 126 (20) | 72 (11) | 265 (41) | 241 (3) | 24 (1) |
| **14** | 112 (24) | 65 (14) | 239 (51) | 208 (3) | 31 (1) |
| **15** | 38 (29) | 16 (12) | 70 (54) | 67 (1) | 3 (0) |
| **16 and 17*** | 22 (29) | 9 (12) | 40 (53) | 35 (0) | 5 (3) |
| **All scores combined** | 3226 (2) | 2990 (2) | 10453 (6) | 7692 (7) | 2761 (4) |
| * mNEWS2 scores of 16 and 17 were combined to avoid reporting categories with too few observations. | | | | | |
