# Supplementary material
Source: Research Square preprint supplement (doi:10.21203/rs.3.rs-8891109/v1)
Supplement: Supplementary file 3 [file e45b5cdea3351b491ea0c641.docx]

**Additional file 1**

| The modified NEWS2 without temperature. | | | | | | | |
| --- | --- | --- | --- | --- | --- | --- | --- |
| NEWS2 | 3 | 2 | 1 | 0 | 1 | 2 | 3 |
| Respiratory rate (bpm) | ≤ 8 |  | 9-11 | 12-20 |  | 21-24 | ≥ 25 |
| SpO2 Scale (%) | ≤ 91 | 92-93 | 94-95 | ≥ 96 |  |  |  |
| Air or oxygen |  | Oxygen |  | Air |  |  |  |
| Systolic blood pressure (mmHg) | ≤ 90 | 91-100 | 101-110 | 111-219 |  |  | ≥ 220 |
| Pulse rate (bmp) | ≤ 40 |  | 41-50 | 51-90 | 91-110 | 111-130 | ≥ 131 |
| Consciousness (GCS) |  |  |  |  |  |  | < 15 |
